# Supplementary material
Source: Springer Nature journal article supplement (https://www.springerprofessional.de/resource/supplementary/13638_2011_201_MOESM8_ESM.pdf/11897270)

BER for SIR = (-5 dB) 2TX

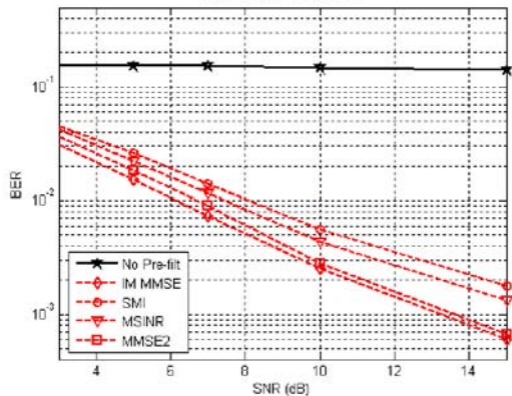

(a) 2 Spatial Streams

BER for SIR = (-5 dB) 3TX

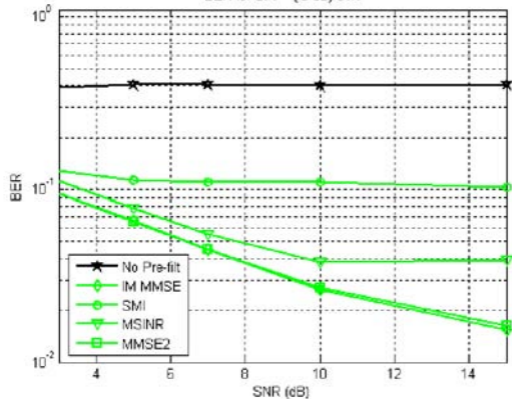

(b) 3 Spatial Streams

Supplement: MOESM8 [file 11897270]
